# Supplementary material for: Association of education levels with the risk of hypertension and hypertension control: a nationwide cohort study in Chinese adults
Source: PubMed Central journal article supplement — J Epidemiol Community Health. 2022 Jan 7;76(5):451–7. doi: 10.1136/jech-2021-217006 (PMC8995829; doi:10.1136/jech-2021-217006), 2022-01-07
Supplement: jech-2021-217006supp001.pdf [file jech-2021-217006supp001.pdf]

**Supplementary Table 1.** The risk of incident HTN according to education level at baseline in different subgroups.

|                                     |            | n, case/subjects | Elementary school and<br>below | Middle school    | High school degree or<br>above |
|-------------------------------------|------------|------------------|--------------------------------|------------------|--------------------------------|
| Newly diagnosed<br>HTN <sup>a</sup> | Age        |                  |                                |                  |                                |
|                                     | ≥ 56.5     | 5,702/22,052     | 1.00 (ref.)                    | 0.78 (0.73-0.83) | 0.71 (0.66-0.76)               |
|                                     | < 56.5     | 5,487/34,099     | 1.00 (ref.)                    | 0.69 (0.64-0.74) | 0.61 (0.57-0.66)               |
|                                     | Sex        |                  |                                |                  |                                |
|                                     | Men        | 4,082/17,305     | 1.00 (ref.)                    | 0.78 (0.72-0.85) | 0.73 (0.67-0.79)               |
|                                     | Women      | 7,107/38,846     | 1.00 (ref.)                    | 0.76 (0.72-0.81) | 0.65 (0.61-0.69)               |
|                                     | BMI        |                  |                                |                  |                                |
|                                     | Normal     | 6,190/36,795     | 1.00 (ref.)                    | 0.72 (0.67-0.77) | 0.59 (0.55-0.63)               |
|                                     | Overweight | 4,140/16,551     | 1.00 (ref.)                    | 0.79 (0.73-0.86) | 0.79 (0.79-0.86)               |
|                                     | Obesity    | 698/2,110        | 1.00 (ref.)                    | 0.94 (0.78-1.14) | 0.74 (0.59-0.92)               |

|                               |        |               |             |                  |                  |
|-------------------------------|--------|---------------|-------------|------------------|------------------|
| Diabetes                      |        |               |             |                  |                  |
|                               | Yes    | 2,619/9,606   | 1.00 (ref.) | 0.78 (0.71-0.86) | 0.71 (0.64-0.78) |
|                               | No     | 8,159/45,175  | 1.00 (ref.) | 0.74 (0.70-0.78) | 0.64 (0.60-0.67) |
| Current smoking               |        |               |             |                  |                  |
|                               | Yes    | 1,849/8,283   | 1.00 (ref.) | 0.84 (0.74-0.95) | 0.77 (0.67-0.88) |
|                               | No     | 9,102/46,643  | 1.00 (ref.) | 0.74 (0.70-0.79) | 0.65 (0.62-0.69) |
| Current drinking              |        |               |             |                  |                  |
|                               | Yes    | 1,283/5,146   | 1.00 (ref.) | 0.80 (0.69-0.92) | 0.68 (0.58-0.79) |
|                               | No     | 9,495/49,112  | 1.00 (ref.) | 0.76 (0.72-0.80) | 0.67 (0.64-0.71) |
| Uncontrolled HTN <sup>b</sup> | Age    |               |             |                  |                  |
|                               | ≥ 56.5 | 17,947/29,073 | 1.00 (ref.) | 0.96 (0.92-0.99) | 0.92 (0.88-0.96) |
|                               | < 56.5 | 9,274/16,735  | 1.00 (ref.) | 0.79 (0.75-0.84) | 0.74 (0.70-0.79) |

## Sex

|       |               |             |                  |                  |
|-------|---------------|-------------|------------------|------------------|
| Men   | 10,770/17,504 | 1.00 (ref.) | 0.93 (0.89-0.98) | 0.93 (0.88-0.98) |
| Women | 16,451/28,304 | 1.00 (ref.) | 0.89 (0.85-0.92) | 0.80 (0.77-0.84) |

## BMI

|            |               |             |                  |                   |
|------------|---------------|-------------|------------------|-------------------|
| Normal     | 12,288/21,074 | 1.00 (ref.) | 0.86 (0.82-0.90) | 0.75 (0.71-0.79)  |
| Overweight | 11,914/19,839 | 1.00 (ref.) | 0.92 (0.88-0.97) | 0.95 (0.90-0.995) |
| Obesity    | 2,658/4,327   | 1.00 (ref.) | 1.01 (0.92-1.12) | 1.03 (0.92-1.15)  |

## Diabetes

|     |               |             |                  |                  |
|-----|---------------|-------------|------------------|------------------|
| Yes | 8,661/14,135  | 1.00 (ref.) | 0.93 (0.88-0.98) | 0.84 (0.79-0.89) |
| No  | 17,795/30,571 | 1.00 (ref.) | 0.84 (0.81-0.88) | 0.80 (0.77-0.83) |

## Current smoking

|     |             |             |                  |                  |
|-----|-------------|-------------|------------------|------------------|
| Yes | 3,818/6,460 | 1.00 (ref.) | 0.86 (0.79-0.94) | 0.88 (0.80-0.96) |
|-----|-------------|-------------|------------------|------------------|

|                                     |               |             |                  |                  |
|-------------------------------------|---------------|-------------|------------------|------------------|
| No                                  | 22,712/38,134 | 1.00 (ref.) | 0.91 (0.88-0.94) | 0.84 (0.81-0.87) |
| Current drinking                    |               |             |                  |                  |
| Yes                                 | 3,565/5,550   | 1.00 (ref.) | 0.91 (0.84-0.99) | 0.95 (0.86-1.04) |
| No                                  | 22,674/38,548 | 1.00 (ref.) | 0.90 (0.87-0.93) | 0.84 (0.81-0.87) |
| Use of antihypertensive medications |               |             |                  |                  |
| Yes                                 | 7,451/12,913  | 1.00 (ref.) | 0.92 (0.86-0.97) | 0.73 (0.69-0.78) |
| No                                  | 19,770/32,895 | 1.00 (ref.) | 0.90 (0.87-0.93) | 0.90 (0.87-0.94) |

- a. The model was adjusted for age, sex, BMI, current smoking, current drinking, family history of diabetes, creatinine, GGT, FPG, insulin, LDL-C, TG, baseline SBP and DBP.
- b. The model was adjusted for age, sex, BMI, current smoking, current drinking, family history of diabetes, creatinine, GGT, FPG, insulin, LDL-C, TG, baseline SBP and DBP, use of antihypertensive medications.
